# Supplementary material for: Bringing SEM and MSI Closer Than Ever Before: Visualizing Aspergillus and Pseudomonas Infection in the Rat Lungs
Source: PubMed Central journal article supplement (PMC7711807; doi:10.3390/jof6040257), 2020-10-30
Supplement: jof-06-00257-s001.pdf [file jof-06-00257-s001.pdf]

## Supplementary Materials: Bringing SEM and MSI Closer Than Ever Before: Visualizing *Aspergillus* and *Pseudomonas* Infection in the Rat Lungs

Tereza Juříková<sup>1,2</sup>, Dominika Luptáková<sup>1</sup>, Olga Kofroňová<sup>1</sup>, Anton Škríba<sup>1</sup>, Jiří Novák<sup>1</sup>, Helena Marešová<sup>1</sup>, Andrea Palyzová<sup>1</sup>, Miloš Petřík<sup>3</sup>, Vladimír Havlíček<sup>1,4\*</sup> and Oldřich Benada<sup>1,5\*</sup>

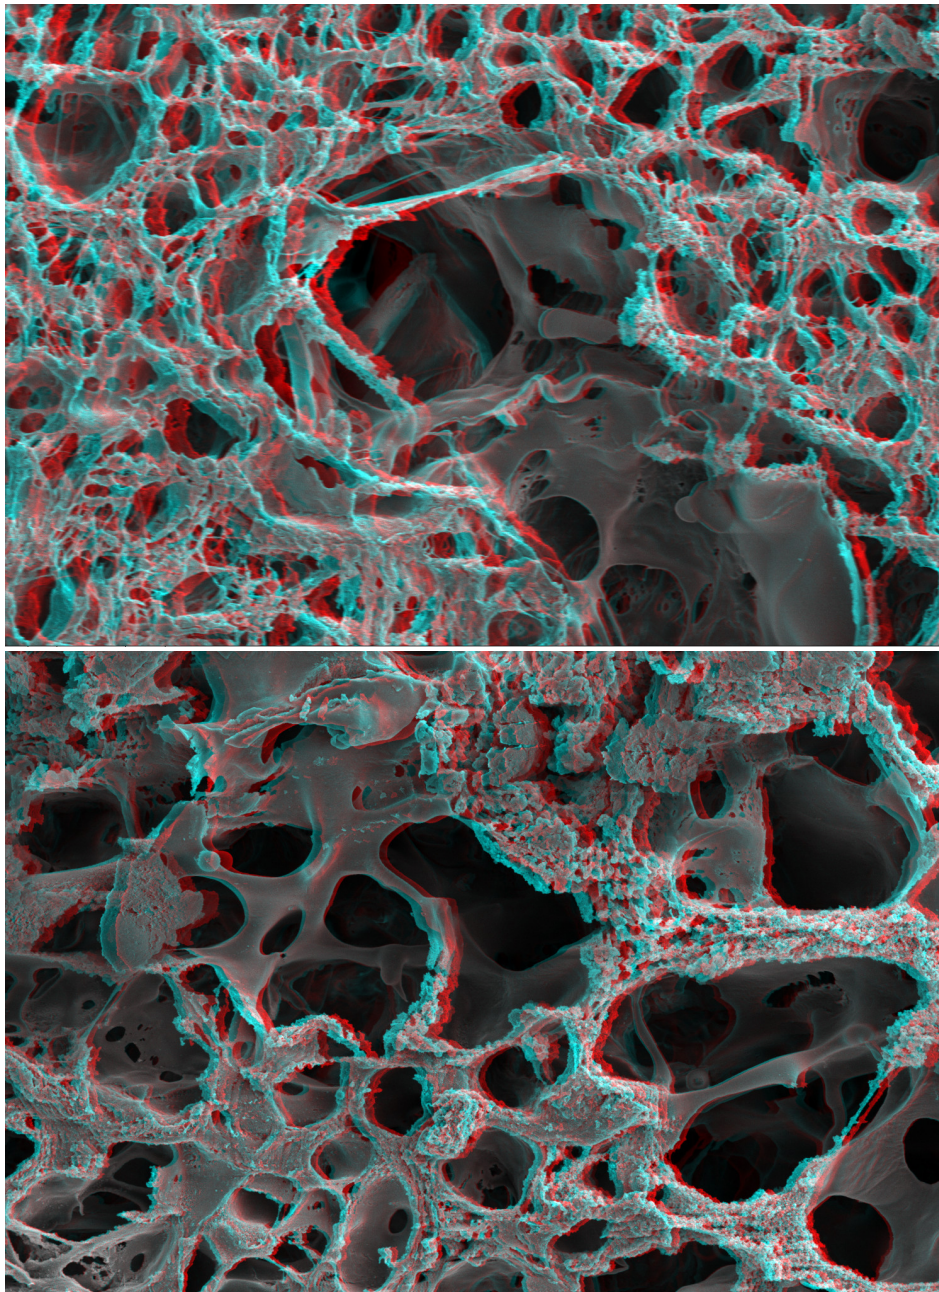

**Figure S1.** Stereo images (R-GB anaglyphs) of float-fixed cryosection from rat lung tissue infected with *A. fumigatus* taken from different parts of the section at a primary magnification of 5000 $\times$  (upper panel, approximate field of view (FOV): 82.9  $\mu\text{m}$   $\times$  55.3  $\mu\text{m}$ ) and 8000 $\times$  (lower panel, approximate FOV: 51.8  $\mu\text{m}$   $\times$  34.5  $\mu\text{m}$ ). The stereo pair tilt angle difference is 6 $^\circ$ ; red-cyan or red-green glasses are required for proper viewing. Instead of scale bars, the FOV size is given for both anaglyphs.

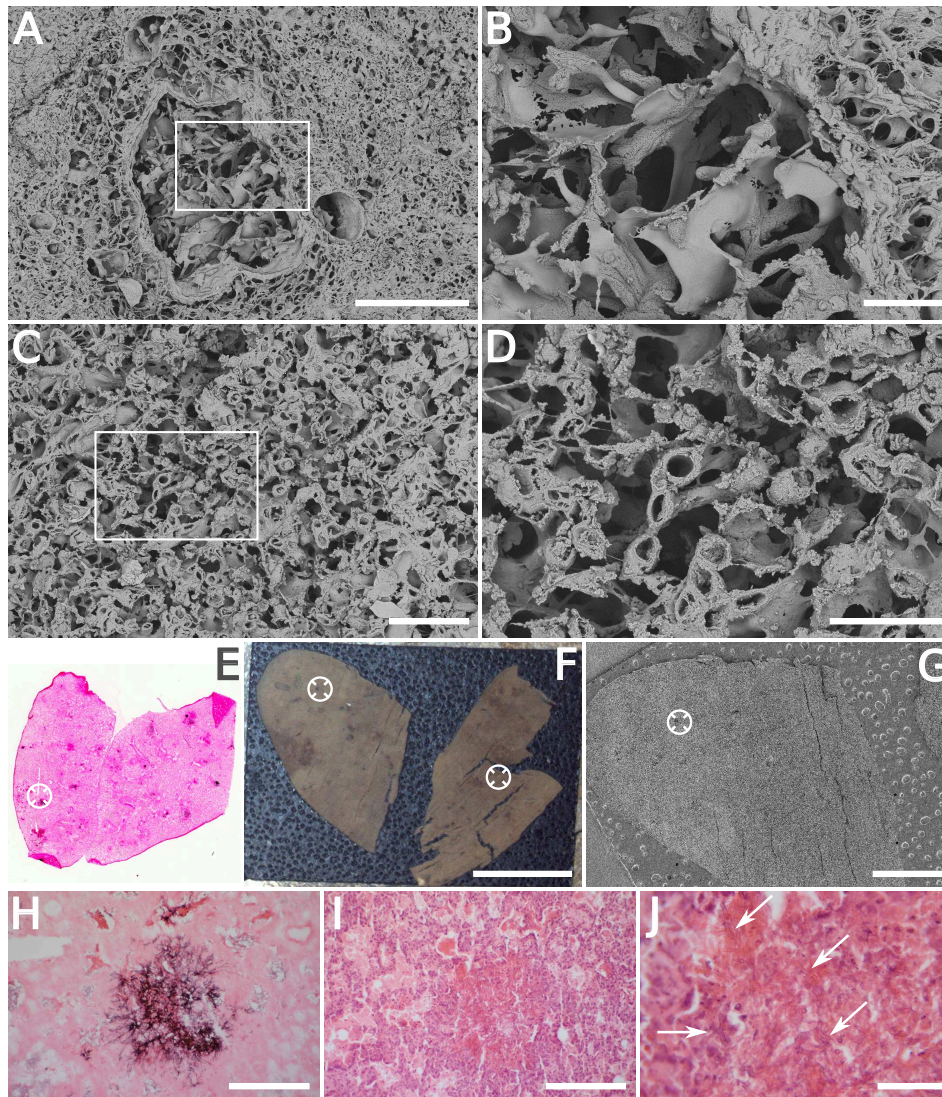

**Figure S2.** A comparison of scanning electron microscopy and histology of *Aspergillus fumigatus* infected rat lung tissue. Panels A, B, C, D correspond to the same panels as of Figure 3 in the main text. Proper locations of areas from which SEM images were taken are marked in the whole lobe section's images (panels E, F, and G). The panels F and G's marked positions were accurately set by scanning electron microscope (SEM) navigation system. The position marked in panel E is approximate. Panel E shows optically scanned Grocott's methenamine silver-stained (GMS) consecutive section. Panel F shows a vacuum dried section on SEM sample mount, and panel G represents the SEM navigation image of the left section shown on the sample mount in panel F. The lowest panel row presents Grocott's methenamine silver-stained consecutive section (panel H) and hematoxylin-eosin (H&E) stained consecutive section (panels I and J). The location of panels H, I, and J should correspond to the marked area in the panels E, F, and G. The *Aspergillus* hyphae are barely visible in the H&E stained section when compared with GMS staining. Scale bars: 100  $\mu\text{m}$  (A); 20  $\mu\text{m}$  (B, C); 10  $\mu\text{m}$  (D); 5 mm (F); 2 mm (G); 250  $\mu\text{m}$  (H, I); 50  $\mu\text{m}$  (J).

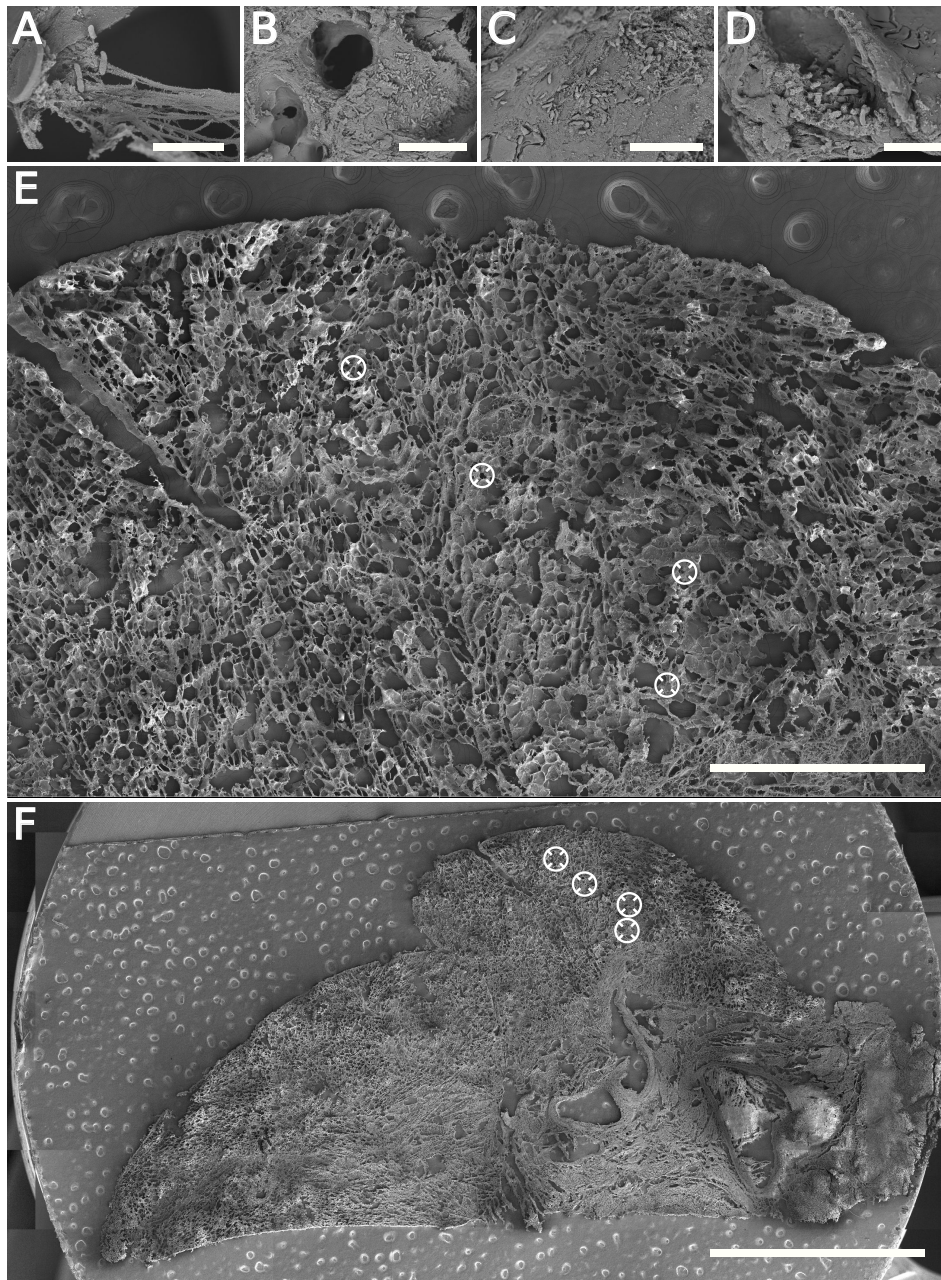

**Figure S3.** Scanning electron microscopy of *Pseudomonas aeruginosa* infected rat lung tissue and exact localization of the areas from which high-resolution images were taken. Panels in the upper row correspond to the panel H, E, F, and G of Figure 3 in the main text. Their exact locations in the lobe section are marked in the same order in the low-resolution panels below. The middle image (panel E) corresponds to the panel E of Figure 4 in the main text. The lower panel F represents the navigation image mapping of the whole lobe section. The panels E and F's marked positions were accurately set by scanning electron microscope navigation system. Scale bars: 5  $\mu\text{m}$  (A); 10  $\mu\text{m}$  (B); 20  $\mu\text{m}$  (C); 5  $\mu\text{m}$  (D); 1 mm (E); 5 mm (F).

## 1. Materials and Methods

### 1.1. Anaglyph construction

- 3 R-GB anaglyphs construction is specific for the type of SEM device. In FEI Nova NanoSEM 450
- 4 the sample must be at an eucentric (analytical) position. Scan rotation was adjusted to  $-90^\circ$  or  $+90^\circ$ .
- 5 This set up the tilt axis perpendicular to the horizontal image axis. A stereo pair of the area of interest

6 was recorded with tilt difference of  $6^\circ$  (usually  $-6^\circ$  and  $0^\circ$ ). The anaglyph was constructed declaring  
7  $-6^\circ$  tilted image (8-bit) as red and zero tilted image (8-bit) as green and also as blue. Final summing of  
8 those three images in 24-bit RGB color space then produced R-GB anaglyph. If the stereo pair tilt axis  
9 moves during tilting its displacement can be rectified in some software (e.g., Stereo modul of Analysis  
10 3.2 software, EMSIS, GmbH, Muenster, Germany).

### 11 1.2. *A comparison of histology and SEM on the consecutive sections*

12 Consecutive sections from deep-frozen rat lung tissue infected by *A. fumigatus* were individually  
13 processed by float-fixation method for SEM and by Grocott's methenamine silver staining (GMS) or  
14 hematoxylin-eosin staining (H&E) for optical microscopy. Float-fixation and GMS procedures are  
15 described in the main text, in the *Material and Methods* section.

16 H&E staining were performed as follows. Dried, thaw-mounted, 15 mm-thick frozen sections  
17 (Leica Microsystems GmbH, Wetzlar, Germany) were rehydrated in the ethanol series (100, 95, and  
18 70%), washed in distilled water and stained by hematoxylin (Sigma-Aldrich, Czech Republic) and eosin  
19 Y (VWR Chemicals, Czech Republic). Dehydrated sections (ethanol, 95, and 100%) were cleared in  
20 xylene and mounted in DPX medium (Sigma-Aldrich, Czech Republic). Final mounts were examined  
21 under a DN45 light microscope (LAMBDA PRAHA Ltd., Prague, Czech Republic) equipped with a  
22 Canon EOS 700D Digital SLR camera.

### 23 1.3. *Exact assignment of the locations of the bacteria in the section*

24 A Navigation Montage option of the SEM software (Helios NanoLab) was used to map the  
25 whole lung lobe section at low resolution. Then the pyoverdine E protonated molecule map from  
26 the consecutive section was used to settle the region of interest with possible presence of bacteria  
27 *Pseudomonas aeruginosa*. Next the sets of images with increasing magnification were recorded in this  
28 region.
